# Supplementary material for: Role of weakly polarized nanoparticles in electroporation
Source: Royal Society of Chemistry journal article supplement (doi:10.1039/c0nr00448k), 2011-01-01
Supplement: c0nr00448k.pdf [file c0nr00448k.pdf]

## Electronic Supplementary Information

### Role of weakly polarized nanoparticles in electroporation

Jeong Ah Kim<sup>a</sup> and Won Gu Lee<sup>b\*</sup>

<sup>a</sup> School of Chemical & Biological Engineering, Seoul National University, 599 Gwanangno, Gwanak-gu, Seoul 151-742, Republic of Korea

<sup>b</sup> Department of Mechanical Engineering, College of Engineering, Kyung Hee University 1 Seochon-dong, Giheung-gu, Yongin-si, Gyeonggi-do 446-701, Republic of Korea

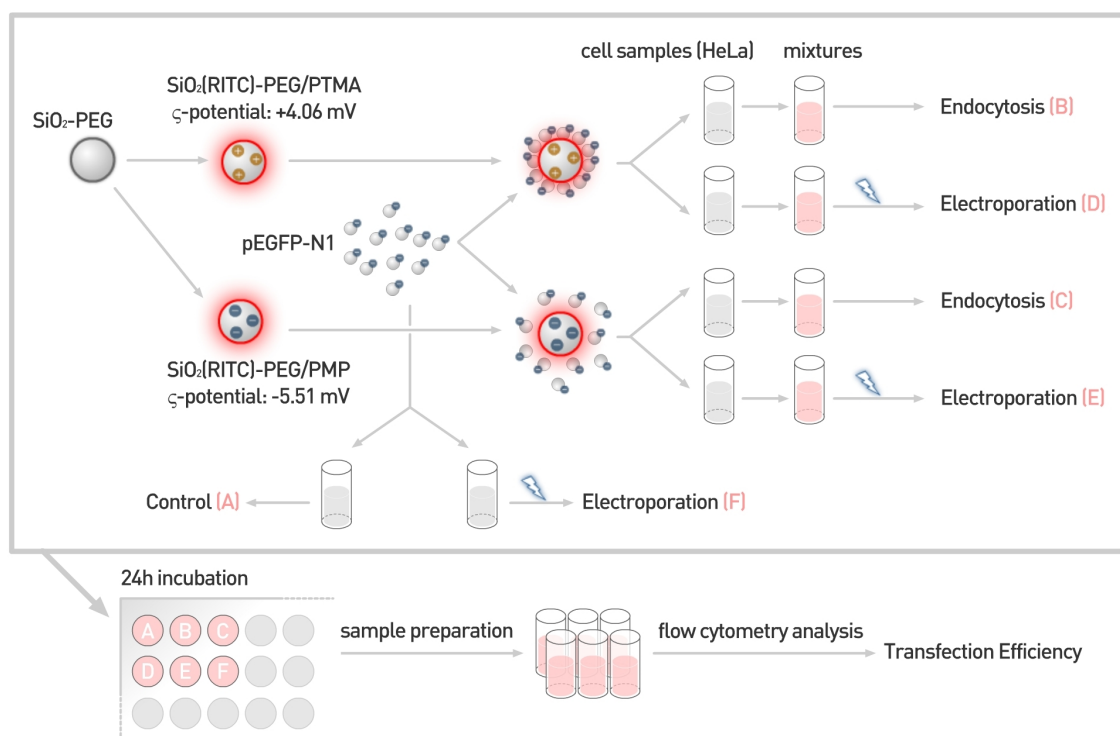

**Figure S1. Illustrated schematic for experimental procedures using nanoparticles**

Experiments for *in vitro* investigation for the effect of oppositely charged SiNPs on the TE are sequentially conducted: (i) preparation of oppositely charged fluorescent SiNPs, (ii) preparation of biological samples, (iii) sample mixing and loading for electroporation and endocytosis, (iv) electroporation, (v) sample preparation after post-incubation (~24 hrs), and (vi) the flow cytometry analysis.

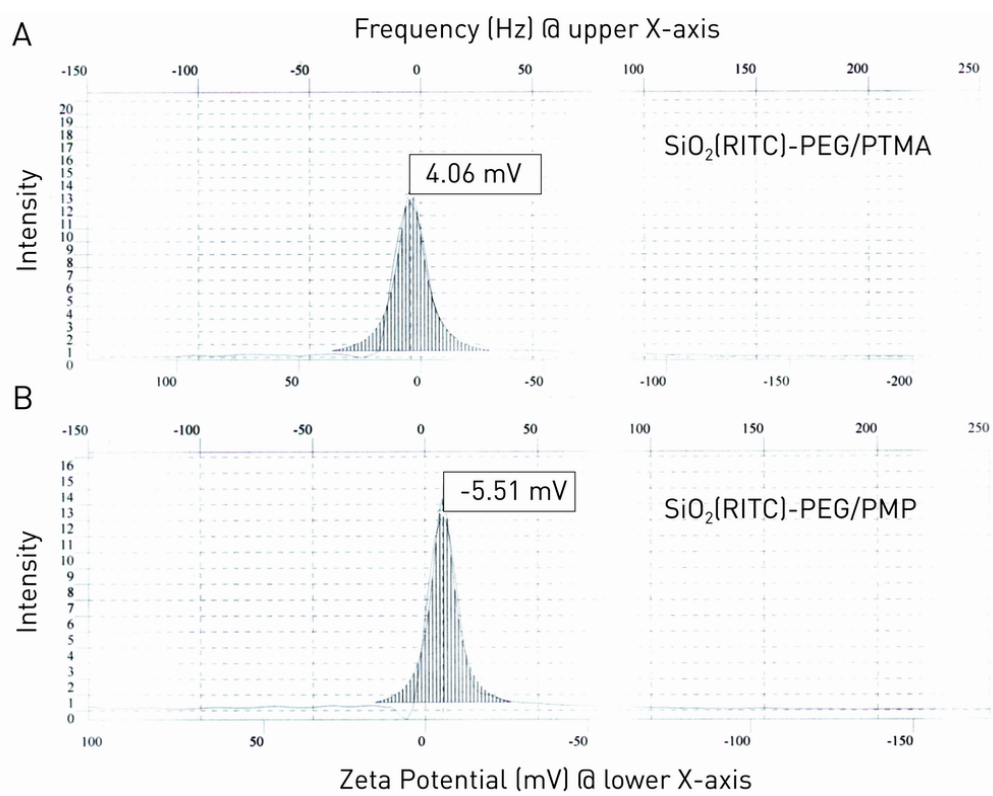

**Figure S2. Measurement of zeta potential**

The distributions of mobility and the zeta potential of oppositely charged SiO<sub>2</sub>(RITC)-PEG nanoparticles, measured using the Smoluchowski equation: (A) for SiNPs(RITC)-PEG/PTMA(+), the mobility and the zeta potential are measured to be  $2.892 \times 10^{-5} \text{ cm}^2 \text{ V}^{-1}$  and +4.06 mV, (B) for SiNPs(RITC)-PEG/PMP(-),  $-3.893 \times 10^{-5} \text{ cm}^2 \text{ V}^{-1}$  and -5.51 mV, respectively.
